# Supplementary material
Source: publisher figshare collection journal article supplement (https://rs.figshare.com/ndownloader/files/13514978)
Supplement: Supplementary file 1 [file 13514978]

**Electronic supplementary material**

**Robust quantification of fish early life CO2 sensitivities via serial experimentation** Hannes Baumann, Emma L. Cross, and Christopher S. Murray

Table S1: Bivariate Pearson correlations between *M. menidia* early life history traits under contrasting CO2 conditions across all 20 experiments. Significant correlations (P < 0.05) are given in bold.

| **Comparison** | | **Correlation: R-value (*P-value*)** | |
| --- | --- | --- | --- |
| **Trait 1** | **Trait 2** | **Ambient CO2** | **High CO2** |
| Embryo survival | Larval survival | 0.16 (*0.13*) | 0.16 (*0.11*) |
| Larval length | -0.05 (*0.67*) | -0.05 (*0.65*) |
| Hatch length | Embryo survival | **0.28 (*0.01*)** | **0.27 (*0.01*)** |
| Larval length | **0.26 (*0.02*)** | **0.22 (*0.04*)** |
| Larval survival | Larval length | **0.22 (*0.04*)** | **0.23 (*0.03*)** |
| Hatch length | 0.20 (*0.07*) | **0.26 (*0.02*)** |
